# Supplementary material for: Protein trans-splicing: optimization of intein-mediated GFP assembly as a model for the development of gene therapy
Source: Front Bioeng Biotechnol. 2024 Nov 20;12:1488912. doi: 10.3389/fbioe.2024.1488912 (PMC11614648; doi:10.3389/fbioe.2024.1488912)
Supplement: Supplementary file 2 [file Table3.XLSX]

## Sheet: PRDM16
RVACSC	104.23
QIKCKD	62.06
SNLCRH	61.61
RFECEN	61.29
TFRCDE	57.72
PFKCHL	56.79
EYKCDQ	56.57
TRRCVE	56.56
RYTCRY	56.41
QESCIK	56.27
NPPCPG	55.52
RRFCEG	54.91
EKFCVD	54.74
SAECPF	54.14
KYACSS	54.11
AHACPD	53.78
AHECKD	53.29
PYRCKY	52.93
HADCRT	52.85
PKVCPA	52.76
LAMCQI	52.6
PFICEV	51.63
LFQCRL	51.28
PGFMSM	44.74
PSPMMD	44.1
AYAMML	42.68
GSGSWL	42.06
GLGIWA	39.33
ADFGWE	38.33
KAFNWK	34.69
SLDAWL	31.55
IETMTE	30.27
VNNMYE	28.71
GWEMLT	26.1
PGAMNS	25.47
SLTMGF	25.4
CERMFP	24.9
RHQMSH	24.66
EQHMIV	24.41
HKRMHA	23.91
KRKMEI	23.78
NLAMCQ	23.76
CGQMFS	23.61
SPDMSD	23.5
NSEMNQ	23.44
PFFMDP	23.06
LGVMAP	23.02
PIPMGP	22.93
HPQMSA	22.91
STRMDK	22.74
FAAMKA	22.69
AEKVKN	21.63
VEEEEE	18.11
HLKKHE	17.07
DEEDEE	16.82
TEEREY	16.39
REPRKN	15.81
VGARAH	15.69
TTKPKE	15.64
GLGFSE	15.41
GSLPYH	15.4
GAGLGI	15.24
VLKEKY	15.24
CPKAFN	15.1
GGLGFS	14.9
GGPSAE	14.84
LRKGKE	14.69
AEEETE	14.67
GLGVGS	14.65
KPFKCH	14.64
GVLTNH	14.53
GVGSDG	14.51
NGGGRE	14.47
DEKEDS	14.31
VSAVSN	14.13
GLKQHK	14.12
SESDNH	14.1
DGDVVN	14.07
DRALAH	14.04
GGGREP	14.01
GGGLLA	14.01
LPNFPH	13.95
QEKKLG	13.81
QDLDSN	13.79
RDKGKD	13.73
GERFGP	13.71
GERKPG	13.71
SGKRFE	13.68
EGKNHY	13.61
VEKRKV	13.51
AGKSQE	13.25
KCHLCN	13.19
FPSRPH	13.15
SGLKQH	13.03
EDTPLH	12.98
RALAHN	12.83
PHHPFN	12.8
CEGKNH	12.75
SPTLNH	12.71
SPLLFH	12.69
EELLVH	12.66
TTSSLN	12.61
QRHVRN	12.59
GEEQPL	12.51
SGVLTN	12.51
FSISSN	12.46
DGSDFE	12.4
LDAWLN	12.27
EPRKNH	12.25
GAYSLG	12.22
GSWLKY	12.2
DFEDIN	12.19
TEKLES	12.16
GKDKGK	12.13
RHKKYA	12.08
FGQQTN	12.08
WAKRKM	12.03
GVSEGL	12.03
AFYSQH	12.02
GLLALE	11.88
AEEAFE	11.86
GEELLV	11.79
TSESDN	11.79
GEELKP	11.76
SNLIRH	11.61
SNLQRH	11.61
SNLQRH	11.61
MDKRPE	11.59
GGLLAL	11.59
VIKDIE	11.56
GPPSPF	11.48
GAQLYE	11.46
PSPTLN	11.45
PSPLGN	11.45
SGAAGD	11.45
KSPLNH	11.44
DSYFSE	11.42
DECDEL	11.42
SSLNKH	11.41
KGKPVE	11.39
QQPSLH	11.39
HGGLGF	11.35
ESGAFN	11.35
ERMFPN	11.33
PEDVEE	11.33
SDGQAH	11.29
GGASVP	11.29
RTHTGE	11.28
FNPINH	11.26
ANLTRH	11.25
TNLDRH	11.25
HNKEKP	11.2
FGKGLD	11.19
LKSPLN	11.13
FPRSAN	11.12
KGKERY	11.09
GAAGDS	11.07
GGREPR	11.06
GTGSDL	11.05
RRHKKY	11.04
GPGFMS	11
GSASAK	10.99
APVSQH	10.99
VVNNMY	10.8
GFPGIF	10.8
YSLEQH	10.8
AMCQIN	10.77
PGAGLG	10.76
YEDEED	10.73
VKDVLN	10.66
RHKRMH	10.65
LEEEDD	10.64
IEPGEE	10.6
GSDGQA	10.58
MDKTKP	10.53
KEAKPA	10.53
KEGSPY	10.5
GLGEEL	10.48
ESKPEF	10.45
PPGAMN	10.45
CIKKQI	10.4
LDLRRH	10.35
ARKLAK	10.34
GATAAT	10.34
GPSSES	10.3
GKGLDL	10.27
RKNHVY	10.19
NIHNKE	10.15
TMGFDH	10.14
KGKDKG	10.13
EGLGVG	10.08
ARASQN	10.07
FSEIRN	10.05
YTQFSN	10.03
SCDDQN	10
KPFICE	9.94
DGQAHE	9.9
EGLGEE	9.89
RGGGLL	9.85
QGATAA	9.83
IPSSGE	9.83
LPHHPF	9.78
AGQSAE	9.77
FQFLPN	9.73
EPTPTF	9.73
LQPLPH	9.69
GTSASS	9.67
PVYIPE	9.65
FTDPSN	9.63
QHKHIH	9.61
AKNQAY	9.61
ICEVCH	9.55
QPSLHY	9.51
MLSLSE	9.51
LGSLPY	9.5
NKYSLE	9.41
YRQAKN	9.41
MLTDTE	9.38
FCVDAN	9.37
VGVLKE	9.37
SEEKFD	9.34
RSKARA	9.3
DFTPKE	9.28
YYKVIK	9.28
FCEGKN	9.28
LGFSEY	9.28
GPYVVT	9.2
AGAQLY	9.17
HEHEGA	9.14
STLDSE	9.12
SEKFCV	9.11
FPHSLY	9.07
RAALKE	9.04
APSLDE	9.02
KKQISE	9.01
QMSAIE	8.99
VESKPE	8.95
APKVPL	8.93
AKRKME	8.92
PIYRVE	8.91
HALLDE	8.89
QAKNQA	8.88
GKNHYT	8.88
LVHVKE	8.87
KQHKHI	8.82
TGPSSE	8.81
AGSGSW	8.8
GKTFAT	8.78
KPGVSE	8.78
FECENC	8.75
SIAEKY	8.74
EPKSPR	8.74
REYKCD	8.7
IPPDFE	8.68
AEKYFG	8.68
EKEDSY	8.68
IASIAE	8.67
GEQPYR	8.64
PGFPGI	8.62
TGEQPY	8.61
DEDPTF	8.54
DEEPPS	8.48
SSPTSE	8.47
FMSMQE	8.46
FPPSLY	8.4
VCHKSY	8.38
GSEEKF	8.37
EPQGVY	8.37
AATGSE	8.35
KEKPFK	8.35
RCKYCD	8.31
MNSVAE	8.26
GKSQED	8.23
GFMSMQ	8.19
EAKPAL	8.18
FIANSE	8.08
EDEEDE	8.08
RESSIP	8.06
GARAHA	8.02
ASAKPE	8
FELRES	7.97
GSLPFS	7.97
ERFGPY	7.95
NHVYGE	7.92
PGSLPF	7.9
EDAYAE	7.88
TGTGSD	7.88
NQAYAM	7.88
FGPGFM	7.87
PFPTSE	7.83
PEEQLL	7.82
ECKDCE	7.76
GQMFST	7.75
SESGAF	7.74
RLEDAY	7.68
LPKVCP	7.66
CGKTFA	7.65
CGKIFP	7.65
GFSEYF	7.63
GDSIKA	7.63
GPSAEC	7.63
GSRARA	7.63
VEERGG	7.58
YEGLGE	7.56
ELKPEG	7.56
VGSDGQ	7.56
KKHEHE	7.56
EEEEEE	7.56
EEEEEE	7.56
SEYFPS	7.54
ALKEAD	7.53
GQAHEC	7.52
NWKSNL	7.52
SAKPED	7.52
EVKDVL	7.52
KEDSYF	7.48
PQGVYE	7.46
RRAAEE	7.46
SDGSDF	7.44
PNKYSL	7.32
FDGRLE	7.32
VSPTPE	7.3
SDLDSD	7.29
SDLDSD	7.29
CHKSYT	7.25
AEVPAF	7.25
GVYEDE	7.22
GQQTNL	7.21
GAFNPI	7.16
GSDLDS	7.15
GSSLQP	7.15
MEIGER	7.15
SPTPEP	7.14
KSYTQF	7.13
KEADFG	7.12
EEEEEL	7.12
RPHPGS	7.11
EVPAFY	7.06
EELEEE	7.05
FSTTSS	7.03
HRRFCE	7.03
EEKFDG	6.99
LGVGSD	6.96
KPALLA	6.95
KLAKSD	6.93
CVKVFT	6.93
GQSAEE	6.9
RHLRTH	6.89
GASVPP	6.87
ELEEED	6.87
GAMNSV	6.86
KPSPTL	6.82
AGLGIW	6.81
VKEGAY	6.79
RSFSIS	6.79
EDVEEE	6.79
GKERYT	6.76
SEIRNF	6.75
PGLPLT	6.74
VSNSSQ	6.74
DAKLPS	6.73
LKQTLY	6.71
EGSPYE	6.7
INEQIY	6.7
DQNLAM	6.69
KEKYLR	6.69
EGAYSL	6.68
TPKEGS	6.66
GDVVNN	6.65
CENCVK	6.65
DSDLDS	6.65
EDDDSL	6.64
RLDLRR	6.57
KARARK	6.56
GKRFEC	6.53
GIFPPS	6.53
GVMAPS	6.5
AMKADS	6.5
SIKAIA	6.49
GILSPI	6.48
LGSEKF	6.48
EKLESF	6.45
GTDLDT	6.45
YPRPPL	6.44
LDTTTG	6.43
MIVHTE	6.39
PGVSEG	6.39
RPPLLP	6.37
SPPPTL	6.37
MCQINE	6.36
SPFFMD	6.36
DGRLED	6.32
EEETED	6.3
NKHRRF	6.3
EEEELE	6.3
EEELEE	6.3
EPGEEL	6.29
KDKGKP	6.29
KPKEAK	6.29
SPFPTS	6.28
AECPFD	6.27
TSASSP	6.27
GIWAKR	6.26
ADSGSS	6.26
APSQSS	6.26
DMSDGS	6.25
PPAFPA	6.24
SRARAS	6.22
RPSPLL	6.22
PGSASA	6.22
QIYYKV	6.19
HECKDC	6.17
KDCERM	6.16
MFPNKY	6.16
KDCGQM	6.16
LDSDLD	6.15
KPSPFF	6.14
VLKQTL	6.14
INTTTG	6.13
GSEKFC	6.12
WEMLTD	6.1
DSGSSL	6.1
SSAGAQ	6.09
FMDPIY	6.09
SPYEAP	6.08
SPTSES	6.08
TVKPFI	6.04
LDSDRD	6.04
KERYTC	6.03
QINEQI	6.03
NHAQDA	6.03
ESFAAM	6.01
LRRAAE	6.01
HVKEGA	6
ERKPGV	6
IPIPPD	5.96
EGAPVS	5.96
LLVKAE	5.95
GNPALP	5.93
RSANLT	5.93
VDANQA	5.92
VGGPSA	5.92
GVLKEK	5.92
SGSSLQ	5.92
GSPYEA	5.91
GSIFTP	5.91
GSDFED	5.91
IPMGPP	5.89
APPAFP	5.89
NPALPL	5.89
PGSIFT	5.88
PYHSVF	5.87
YEAPVY	5.86
VPPGAM	5.85
QASTRM	5.84
LNKHRR	5.81
GLPLTP	5.81
GLDLRR	5.81
EEAFEV	5.8
GAPVSQ	5.77
KGLDLR	5.77
SKARAR	5.76
EVSSQE	5.76
FFPPPE	5.76
SEMNQA	5.76
AFNPIN	5.74
DKGKDK	5.74
RAHACP	5.73
DELFQC	5.72
SDFEDI	5.69
PTSESD	5.69
TDLDTT	5.68
GKPVES	5.67
PSQSSL	5.67
RKGKER	5.65
ALKVGG	5.64
SFAAMK	5.63
QQTNLD	5.63
GRLEDA	5.62
GKIFPR	5.6
FGGASV	5.59
EDSYFS	5.59
RNFIAN	5.59
SGAFNP	5.59
IGERFG	5.57
STTSSL	5.57
PEFGGA	5.57
ETMTEK	5.56
QGVYED	5.56
RARASQ	5.55
PRKNHV	5.54
SDNHAL	5.52
RHVRNI	5.51
HQMSHD	5.5
SEDLGS	5.49
EIGERF	5.47
KEGAYS	5.47
YAKPSP	5.47
RQAKNQ	5.45
RDALKV	5.42
CPAQLP	5.42
LAKSDG	5.41
DSDRDK	5.41
EETEDG	5.4
GFDHTR	5.4
KKYACS	5.37
NHALLD	5.37
LCNRCF	5.35
PAFPAL	5.34
GLPKVC	5.34
IANSEM	5.34
SEDTPL	5.32
PTSEDF	5.31
DLDSDL	5.31
CRHKRM	5.3
HSLYPF	5.3
EDEEPP	5.3
RARKLA	5.28
LFHPQM	5.28
DANQAG	5.27
YSQHSF	5.26
EPPSLT	5.26
AVSNSS	5.24
QAYAMM	5.24
PPSLTM	5.22
FSAAPP	5.21
DLTTKP	5.21
PEPQGV	5.21
QHMIVH	5.2
KNHVYG	5.2
PIPPDF	5.18
TPSPMM	5.18
QPLPHH	5.18
ECDELF	5.17
SQHSFF	5.17
PKSPRD	5.16
RHIRSQ	5.15
GREPRK	5.14
VRNIHN	5.14
PDMSDG	5.13
SQHSGV	5.13
PEIQDL	5.13
EPDPDL	5.12
NKEKPF	5.11
PEDIPI	5.11
DAYAEK	5.1
HPFNFR	5.1
FPALTP	5.09
LGNPAL	5.09
PSPFFM	5.09
PSPLLF	5.09
SQSSLD	5.09
WLKYIR	5.08
ATSSGL	5.08
PGIFPP	5.08
RHLKKH	5.08
KHIHST	5.07
SEVLKQ	5.07
DSGKRF	5.05
LVKAEP	5.05
KNHYTP	5.04
ALTPGF	5.04
EEDEEP	5.04
QPYRCK	5.03
MGFDHT	5.03
NEQIYY	5.03
SPMMDK	5.03
KSNLIR	5.02
QEDTVS	5
NSTLDS	5
SDRDKG	4.99
LESFAA	4.99
IKAIAS	4.98
NMYEPD	4.97
KNRSPD	4.97
TEDGIL	4.96
DTTTGT	4.95
KPVESK	4.93
DKTKPS	4.91
DSNPPC	4.89
QHSGVL	4.87
QMSHDS	4.86
EGLPKV	4.86
PRAALK	4.84
LTASGA	4.84
HEGAPV	4.84
DNHALL	4.84
MSHDSG	4.83
QDAKLP	4.83
PSAECP	4.83
LNHAQD	4.82
HSFFPP	4.82
RMHADC	4.8
EDLGSE	4.79
ASTRMD	4.79
LPPTPL	4.78
SPLGNP	4.78
EEREYK	4.77
LLKSPL	4.77
PALLAP	4.76
SASSPT	4.76
NRSPDM	4.75
PEGLGV	4.75
DLDSDR	4.74
QLPQQP	4.74
DRSFSI	4.73
KHRRFC	4.71
TNHLGT	4.71
KTFATS	4.7
PPLLPP	4.7
DLSIGS	4.7
SFSISS	4.69
FGWEML	4.69
FPPPEE	4.69
TGSEEK	4.68
TGSDLD	4.68
KKLGSL	4.68
SEGLPK	4.67
SGSWLK	4.66
CEVCHK	4.66
LPSPLG	4.66
RPEIQD	4.66
DVVNNM	4.64
PDPDLL	4.64
PPSPFP	4.64
TEVSSQ	4.64
SLYPFT	4.64
KRKVAD	4.64
EAFEVK	4.64
PSPFPT	4.6
FEDINT	4.6
ANSEMN	4.59
QLYEGL	4.58
DPTFRC	4.57
TPGSIF	4.57
PLTPSP	4.56
QSAEEE	4.55
DPSNLQ	4.55
PSSESG	4.55
DFGWEM	4.54
SLAGKS	4.54
EELKPE	4.53
PFNFRS	4.52
KVADPV	4.51
FPTSED	4.5
SEDFTP	4.5
PSRPHP	4.5
PLLPPT	4.5
RKLAKS	4.49
NTTTGT	4.49
TASGAA	4.49
QAHECK	4.48
QPLDLS	4.48
YSLGVM	4.47
QTNLDR	4.47
PPTLSD	4.45
ACSSAG	4.43
PLHAPS	4.43
LEQHMI	4.42
VPLIPS	4.42
RRCVEE	4.42
QTLYRQ	4.42
TPLHAP	4.42
AAMKAD	4.41
LGTSAS	4.38
EDTVSP	4.37
PHSLYP	4.36
STVKPF	4.36
RSPDMS	4.36
ASSPTS	4.35
RMDKRP	4.35
VKAEPK	4.34
RNIHNK	4.33
CDDQNL	4.32
SISSNL	4.32
KRMHAD	4.31
DHTRRC	4.31
DPDLLA	4.3
RAAEEA	4.3
VSSQES	4.28
PTFRCD	4.28
KHEHEG	4.28
AAEEAF	4.28
DCGQMF	4.28
SVFPFQ	4.28
NHYTPG	4.27
HPGSLP	4.27
SDGDVV	4.26
SNSSQG	4.26
VACSCD	4.25
MSAIET	4.25
EMNQAS	4.25
RCVEER	4.25
EKYFGP	4.24
EKYLRP	4.24
SYFSEI	4.24
SYTQFS	4.24
PSNLQR	4.23
DCGKTF	4.21
AMNSVA	4.21
VPAFYS	4.2
CPFDLT	4.2
NPINHL	4.2
PNFPHS	4.19
DPVGVL	4.19
SPRDAL	4.19
RVEKRK	4.19
LDEDPT	4.18
DCERMF	4.18
HKHIHS	4.18
AHNLLV	4.18
DDSLAG	4.18
SSNLQR	4.17
DDDSLA	4.17
KQTLYR	4.17
PDCGKT	4.15
KAEPKS	4.15
AAPPAF	4.14
AEPKSP	4.14
PQQPSL	4.14
SPIPMG	4.13
IGSRAR	4.12
KSQEDT	4.12
QISEDL	4.11
EEQPLD	4.11
LNSTLD	4.11
DINTTT	4.11
CDECDE	4.1
FEVKDV	4.1
DGILSP	4.07
KTKPSP	4.07
SAIETM	4.07
QRHIRS	4.05
EDFTPK	4.04
FPNKYS	4.04
QCPKAF	4.04
NCVKVF	4.04
SQHVGA	4.04
RASQNG	4.04
SQNGGG	4.04
PVSQHS	4.04
RKMEIG	4.03
VMAPSL	4.03
SAVSNS	4.03
PALPLV	4.03
HDSGKR	4.02
QHSFFP	4.02
KCKDCG	4.01
TPGFPG	4.01
EKRKVA	4.01
RSPPPT	4.01
SANLTR	4.01
PPTPLL	3.99
AQLPQQ	3.96
LSLSED	3.96
HSTVKP	3.96
ELRESS	3.95
TGTDLD	3.94
DRHLKK	3.92
SVAEVP	3.91
TFATSS	3.91
APVYIP	3.9
PPSLYP	3.9
CKYCDR	3.9
VLNSTL	3.89
SLEQHM	3.88
LPQQPS	3.88
QSSLDA	3.87
PDLLAG	3.85
LVSAVS	3.85
HNLLVK	3.85
TRHLRT	3.85
TPGLPL	3.84
FDHTRR	3.84
HTRRCV	3.84
KYSLEQ	3.83
PLNHAQ	3.83
TPRAAL	3.83
ETEDGI	3.81
HMIVHT	3.81
EEQLLT	3.81
AKPSPF	3.81
SGEEQP	3.81
RMFPNK	3.8
TPLLKS	3.79
TTTGTD	3.78
LPYHSV	3.78
ERYTCR	3.78
EHEGAP	3.78
EEEDDD	3.78
ESSIPG	3.77
TPEPQG	3.77
LIRHQM	3.75
SLNKHR	3.75
SLHYAK	3.75
LEDAYA	3.75
KVKNRS	3.75
PKAFNW	3.72
YEPDPD	3.71
KQISED	3.71
NQAGSG	3.71
NQASTR	3.71
SASAKP	3.71
PFSAAP	3.7
ATAATG	3.7
AFNWKS	3.69
PHPGSL	3.68
VKNRSP	3.68
KVIKDI	3.68
DLRRHK	3.68
RYCGKI	3.68
DLRRAA	3.68
LNHGGL	3.67
NLTRHL	3.66
HYAKPS	3.65
SAGAQL	3.64
FNWKSN	3.64
HKSYTQ	3.63
FSNLCR	3.63
PGEELL	3.62
EQLLTA	3.62
LEPTPT	3.62
YAMMLS	3.62
SLYPRP	3.61
HVYGER	3.61
DAWLNI	3.61
LSPIPM	3.6
MFSTTS	3.6
QFLPNF	3.6
DVLNST	3.6
PSLYPR	3.59
LTMGFD	3.59
PDFELR	3.58
DKRPEI	3.58
TQFSNL	3.57
QFSNLC	3.56
PTPEPQ	3.56
LHAPSQ	3.56
YKVIKD	3.55
HLRTHT	3.55
QNLAMC	3.54
IKCKDC	3.53
PKEAKP	3.53
DKGKPV	3.52
LRTHTG	3.52
IHNKEK	3.52
HIRSQH	3.51
SLSEDT	3.51
HACPDC	3.49
LHYAKP	3.49
SAAPPA	3.48
SSLQPL	3.48
HVRNIH	3.48
PTPTFG	3.48
FYSQHS	3.47
FPGIFP	3.47
ASGAAG	3.47
RCFGQQ	3.47
EVLKQT	3.47
EKFDGR	3.45
KYFGPG	3.45
KIFPRS	3.45
ESCIKK	3.44
RSQHVG	3.44
HSGVLT	3.43
ECENCV	3.42
VHTEER	3.41
NSSQGA	3.41
KDVLNS	3.41
VSQHSG	3.4
DTVSPT	3.4
ENCVKV	3.39
TLNHGG	3.39
PFQFLP	3.39
SQESCI	3.38
MHADCR	3.38
QMFSTT	3.38
DSLAGK	3.38
EERGGG	3.38
PMGPPS	3.37
SSQESC	3.37
LKEADF	3.36
EKVKNR	3.35
IAEKYF	3.35
KVFTDP	3.35
DLDTTT	3.35
LAHNLL	3.35
DLDSNP	3.35
RFCEGK	3.34
EEPPSL	3.34
LPLTPS	3.33
LTNHLG	3.33
HYTPGS	3.32
PQMSAI	3.32
VKVFTD	3.31
AGDSIK	3.31
KNQAYA	3.31
LDEKED	3.29
PMMDKT	3.29
VLTNHL	3.29
PSSGEE	3.28
KPEDVE	3.28
SSQGAT	3.27
PPCPGS	3.27
SPLNHA	3.26
IPEDIP	3.25
LTPSPM	3.25
KAIASI	3.25
EIRNFI	3.25
TLYRQA	3.25
SHDSGK	3.24
PTLSDP	3.24
HLCNRC	3.23
ADCRTQ	3.22
IFTPGL	3.21
PALTPG	3.21
LKYIRV	3.19
EKKLGS	3.19
PRSANL	3.19
EKPFKC	3.19
KPEGLG	3.18
KPEFGG	3.18
RTQIKC	3.17
CRYCGK	3.17
ELFQCR	3.16
PAFYSQ	3.16
PKVPLI	3.16
QNGGGR	3.16
KVCPAQ	3.16
KDIEPG	3.14
KFDGRL	3.14
CNRCFG	3.14
LDSEVL	3.14
TVSPTP	3.13
NNMYEP	3.12
KFCVDA	3.12
EYFPSR	3.12
PFTDRA	3.12
DQCPKA	3.12
KRFECE	3.12
NITGPS	3.12
DDQNLA	3.11
TSSGLK	3.11
TSSLNK	3.11
PAQLPQ	3.09
KYCDRS	3.06
FQCRLD	3.05
DCRTQI	3.05
HAQDAK	3.05
SSESGA	3.04
LGEELK	3.04
DALKVG	3.03
EDGILS	3.02
YGERKP	3.02
YCGKIF	3.02
PTFGKG	3.02
AQDAKL	3.01
TDRALA	3.01
DPIYRV	3.01
KYLRPS	3.01
MKADSG	3.01
NHLGTS	3.01
LDSNPP	3
HKKYAC	2.99
SAEEET	2.99
TAATGS	2.99
YPFTDR	2.98
DRDKGK	2.98
RKVADP	2.97
TLSDPI	2.97
TDPSNL	2.97
PLPHHP	2.97
AIASIA	2.95
VFTDPS	2.95
AFPALT	2.95
RFGPYV	2.94
CSSAGA	2.94
AKSDGD	2.93
KSDGDV	2.93
CHLCNR	2.93
ANQAGS	2.92
PSLHYA	2.92
DPILRK	2.91
CDRSFS	2.91
KLGSLP	2.9
YHSVFP	2.9
LPFSAA	2.89
YTCRYC	2.89
PSLTMG	2.89
QHVGAR	2.88
TTGTDL	2.88
TDTEVS	2.88
TMTEKL	2.88
FGPYVV	2.87
WLNITG	2.86
EREYKC	2.86
EDPTFR	2.85
VAEVPA	2.85
YCDRSF	2.85
RKPGVS	2.84
KSPRDA	2.83
LTRHLR	2.83
ISSNLQ	2.82
MGPPSP	2.81
SIFTPG	2.81
DLLAGQ	2.8
ACSCDD	2.8
SSLDAW	2.8
LGIWAK	2.79
PSLDED	2.79
THTGEQ	2.79
ERGGGL	2.79
EDIPIP	2.78
EDINTT	2.78
TPTFGK	2.78
CDQCPK	2.77
WKSNLI	2.77
IVHTEE	2.76
AFEVKD	2.76
IPGAGL	2.75
HIHSTV	2.75
VFPFQF	2.75
EMLTDT	2.74
PLLKSP	2.74
PLLFHP	2.74
AWLNIT	2.74
YKCDQC	2.73
IHSTVK	2.73
KLPSPL	2.73
FPFQFL	2.73
LQRHVR	2.72
VVTPRA	2.71
AYSLGV	2.7
EVCHKS	2.7
NHGGLG	2.7
DSEVLK	2.7
LQRHIR	2.69
MNQAST	2.68
SIGSRA	2.68
SWLKYI	2.67
PPPEEQ	2.67
PYVVTP	2.66
YACSSA	2.66
FKCHLC	2.66
NFIANS	2.66
QCRLDL	2.65
TSEDFT	2.64
AALKEA	2.64
NSVAEV	2.63
DSIKAI	2.63
EAPVYI	2.62
RCDECD	2.61
MSDGSD	2.61
PKEGSP	2.6
PRPPLL	2.6
LDRHLK	2.6
IRHQMS	2.6
QLLTAS	2.6
LSIGSR	2.59
EEDDDS	2.59
FATSSG	2.58
PPEEQL	2.56
QAGSGS	2.56
ARARKL	2.55
SLPFSA	2.55
SLPYHS	2.55
HSVFPF	2.53
IRNFIA	2.53
TTTGTG	2.52
NFRSPP	2.52
TFGKGL	2.52
SDPILR	2.51
ASIAEK	2.5
ESDNHA	2.5
KVGGPS	2.5
PTPLLK	2.49
TKPKEA	2.49
SSGLKQ	2.49
NFPHSL	2.48
ECPFDL	2.48
PPPTLS	2.47
PTLNHG	2.47
KMEIGE	2.46
SLQPLP	2.46
DIPIPP	2.45
SFFPPP	2.45
CPDCGK	2.44
CSCDDQ	2.43
VYIPED	2.42
PPDFEL	2.42
SSGEEQ	2.42
KADSGS	2.42
VHVKEG	2.41
ELLVHV	2.4
EFGGAS	2.4
ALAHNL	2.4
FDLTTK	2.4
ALLAPK	2.4
IWAKRK	2.39
KCDQCP	2.39
CDELFQ	2.39
PYEAPV	2.37
CRLDLR	2.36
TRMDKR	2.36
DTEVSS	2.35
PLGNPA	2.34
PLDLSI	2.34
TCRYCG	2.32
CFGQQT	2.32
SNPPCP	2.32
AKLPSP	2.31
LLAPKV	2.31
LKQHKH	2.3
NLCRHK	2.3
LCRHKR	2.3
TTGTGS	2.3
KLESFA	2.3
YFSEIR	2.3
FICEVC	2.29
LKEKYL	2.28
DTPLHA	2.28
AQLYEG	2.27
DFELRE	2.26
CRTQIK	2.25
LLALEP	2.25
PVESKP	2.24
NLQRHI	2.23
KYIRVA	2.22
MAPSLD	2.22
LLAGQS	2.21
ASQNGG	2.2
YRCKYC	2.2
NRCFGQ	2.2
TKPSPT	2.19
AKPALL	2.19
EQPYRC	2.19
SMQEKK	2.19
CQINEQ	2.18
PILRKG	2.18
PLIPSS	2.17
DVEEEE	2.17
EADFGW	2.16
HTEERE	2.16
ARAHAC	2.16
ADPVGV	2.15
CPGSAS	2.15
NLLVKA	2.14
DLGSEK	2.13
ASVPPG	2.13
EQIYYK	2.12
CKDCGQ	2.12
EQPLDL	2.12
HHPFNF	2.12
HTGEQP	2.12
EIQDLD	2.12
KVPLIP	2.09
AMMLSL	2.09
ILSPIP	2.08
IKKQIS	2.07
NLDRHL	2.07
DIEPGE	2.06
KRPEIQ	2.06
AYAEKV	2.03
SQGATA	2.02
SKPEFG	2.02
SQEDTV	2.02
LALEPT	2.01
PCPGSA	2
YFGPGF	2
LTDTEV	1.99
SSIPGA	1.98
VADPVG	1.98
LYPFTD	1.97
PVGVLK	1.97
LKKHEH	1.97
LAGQSA	1.94
FRCDEC	1.93
NLQRHV	1.93
FFMDPI	1.92
MRSKAR	1.9
LTTKPK	1.89
HAPSQS	1.89
MQEKKL	1.88
ALPLVS	1.87
VSEGLP	1.87
CKDCER	1.85
LLTASG	1.84
FTDRAL	1.84
PLVSAV	1.83
AAGDSI	1.83
SLGVMA	1.8
HLGTSA	1.8
VCPAQL	1.78
MDPIYR	1.78
NLIRHQ	1.77
LDLSIG	1.77
ALLDEK	1.77
MMLSLS	1.76
LLFHPQ	1.75
IRSQHV	1.74
LPLVSA	1.74
LDLRRA	1.74
HVGARA	1.73
FRSPPP	1.7
ATGSEE	1.69
SCIKKQ	1.66
YIRVAC	1.66
AKPEDV	1.66
YLRPSP	1.63
IFPPSL	1.62
FSEYFP	1.57
LYRQAK	1.57
SLDEDP	1.56
VKPFIC	1.56
TQIKCK	1.56
PFDLTT	1.53
FHPQMS	1.53
IYRVEK	1.53
SIPGAG	1.52
FNFRSP	1.52
MSMQEK	1.5
ILRKGK	1.5
YTPGSI	1.49
SVPPGA	1.49
ACPDCG	1.46
LSDPIL	1.46
VTPRAA	1.45
LSEDTP	1.42
ISEDLG	1.41
LAGKSQ	1.38
IYYKVI	1.37
VYEDEE	1.37
LNITGP	1.37
VYGERK	1.33
AIETMT	1.3
TLDSEV	1.3
LKVGGP	1.27
ALEPTP	1.27
YIPEDI	1.26
CVDANQ	1.23
SRPHPG	1.22
YVVTPR	1.2
MTEKLE	1.16
LKPEGL	1.15
YAEKVK	1.13
CVEERG	1.13
ITGPSS	1.13
IKDIEP	1.07
LTPGFP	1.07
FTPKEG	1.05
FTPGLP	1.02
PRDALK	1
IQDLDS	1
LAPKVP	0.97
YFPSRP	0.93
YRVEKR	0.9
LYEGLG	0.89
FLPNFP	0.83
MYEPDP	0.8
IFPRSA	0.8
LRESSI	0.78
LYPRPP	0.71
LLVHVK	0.68
LIPSSG	0.67
LRRHKK	0.65
IRVACS	0.64
LRPSPL	0.42
LLDEKE	0.29
MMDKTK	0.26
LLPPTP	0.22

## Sheet: GFP_N3
Rating position	Sequence	Site score	Site position	Secondary structure	Reference
1	GVQCFS	55.64	69/70	ALFA-HELIX	Tornabene et al., 2019
2	KFICTT	52.32	47/48	BETA-SHEET
3	LPVPWP	34.32	55/56	ALFA-HELIX
4	KSAMPE	30.25	86/87	ALFA-HELIX	Khoo et al., 2020
5	TLGMDE	26.87	228/229	NON STRUCTED
6	RDHMVL	26.37	217/218	BETA-SHEET
7	PDHMKQ	24.85	77/78	ALFA-HELIX
8	VYIMAD	22.42	152/153	BETA-SHEET
9	GEGEGD	22.29	33/34	BETA-SHEET
10	GDVNGH	19.7	21/22	NON STRUCTED
11	ADKQKN	19.64	156/157	NON STRUCTED	Kanno et al., 2011 Tasfaout et al., 2024
76 positions are skipped
87	KGIDFK	5.93	127/128	NON STRUCTED	Ozawa et al., 2006
98 positions are skipped
185	TTLTYG	2.8	64/65	NON STRUCTED	Khoo et al., 2020
49 positions are skipped
234	LVELDG	0.82	17/18	BETA-SHEET

## Sheet: FOXP4H
Column1	Column2
LHKCFV	55.98
ETLCED	55.42
HGECKW	53.95
DKFCSP	53.58
WPGCET	52.72
AAVCPT	52.45
TAQCRV	51.89
LQAMMA	44.81
SVAMMS	44.4
GECKWP	38.4
KGAVWT	36.57
EIYNWF	35.51
NTATWK	34.05
LPQLWK	31.49
SPGMLN	31.29
PPKMTG	26.07
QALMLQ	25.11
PQQMQQ	24.24
SPQMLT	23.8
VKNMIS	23.75
NGEMSP	23.68
RVQMQV	23.47
HLHMRP	22.69
FTRMFA	22.01
LLQMQQ	21.21
GSASLH	17.68
GEGAPG	17.52
GQNGVG	17.09
GSSGGA	16.49
RDSSSH	16.05
GGATGT	15.93
KEALGN	15.63
GQFIKH	15.47
GATGTT	14.94
QLQQQH	14.74
HEFYKN	14.51
QAMMAH	14.18
GGGPAR	14.01
SELAQN	13.86
TGADSN	13.84
FIKHLN	13.71
EPLPSN	13.66
SPPLSH	13.63
QQHLLN	13.58
SGTGRE	13.44
KNAVRH	13.38
GSHPLY	13.33
AEAEED	13.05
QQEQLH	12.85
GSLSGQ	12.84
RQLTLN	12.78
GLSSPG	12.65
GPPLGA	12.38
ELAQNH	12.36
HHTLPN	12.32
GTAATA	12.21
GQADGS	12.19
DGSSGG	12.17
APSGQN	12.13
KEEPAE	12.12
KPQPKE	12.05
GLSYGA	11.28
VGAPVE	11.22
LSSPGN	11.2
VSLQPN	11.16
GSASSL	11.13
PDGLVH	11.13
GTTASG	11.12
PTLVKN	11.12
AYFRRN	11.1
PLGAPN	10.95
GMLNPG	10.82
KESERL	10.8
TATWKN	10.77
ETPGSH	10.76
LEEELP	10.75
GHGECK	10.67
DSSSHE	10.61
FVRVEN	10.6
PPQYSH	10.54
GLDLTG	10.48
GNKQLA	10.37
SYGALN	10.37
GTGREV	10.33
SFPLLN	10.33
VESASE	10.32
PAELLH	10.31
FSQPLN	10.31
GADSNG	10.17
GAPGQP	10.17
QQLQEY	10.15
QNHEFY	10.14
PGQPAE	10.11
RQAILE	10.09
RPPFTY	10.08
SPISSE	9.99
GLGSAS	9.91
GVGSLS	9.84
PGSSSF	9.84
GSSSFS	9.7
DEREYQ	9.67
QLTLNE	9.62
CETLCE	9.53
GEMSPA	9.44
QAALAE	9.38
QVQVKE	9.35
GGPARR	9.34
YYKKQQ	9.28
REYQKR	9.25
ALNASY	9.25
QEYYKK	9.14
EPAEAE	9.14
KHLNTE	9.1
HGGGPA	9.1
SGGATG	9.03
ADSNGE	9.02
LLPLSH	8.94
EPKPFS	8.88
EGAPGQ	8.81
VGSLSG	8.66
TLNEIY	8.62
VWTVDE	8.61
QLWKGE	8.45
GSSSPP	8.39
DSVKQE	8.36
DSKQSA	8.31
LQQLQE	8.3
SGLSYG	8.22
QPKEAL	8.17
HMRPSE	8.15
HEETPG	8.11
GPARRR	8.11
SDKFCS	8.01
ISGLSY	7.95
PGNNDS	7.93
AEEDRQ	7.92
QQLLQM	7.92
AELLHF	7.89
ESASET	7.88
YGHGEC	7.82
QSASAV	7.81
PGPPLG	7.76
AGKPQP	7.75
NGSSSP	7.72
GPPEDR	7.71
QQLQQQ	7.7
GPLQTL	7.69
TSAAAP	7.63
PGSASS	7.59
TEHALD	7.59
YKKQQE	7.56
KWPGCE	7.56
ASGPPE	7.54
VDEREY	7.45
QVARQF	7.45
NGVGSL	7.34
TRMFAY	7.32
VVQQLE	7.28
IQLAKE	7.25
QQMQQI	7.22
GNNDSK	7.19
CFVRVE	7.15
GALNAS	7.15
SETIRS	7.08
DSNGEM	7.07
KGEGAP	7.02
AESSFP	6.95
QPGPPL	6.94
VENVKG	6.92
PGLGSA	6.91
VSAADS	6.88
PPKVSP	6.84
YQAALA	6.82
GQPAED	6.79
SGQNGV	6.78
LAQNHE	6.77
SEPKPF	6.75
YGALNA	6.72
PSNGSS	6.71
RRRSSD	6.69
QLHLQL	6.68
SGQADG	6.68
QLAFQQ	6.66
RSSDKF	6.61
LSPPQY	6.58
QPNQAS	6.56
LYGHGE	6.55
GKPQPK	6.53
QALLQQ	6.5
APNPSA	6.49
PGSHPL	6.47
FYKNAD	6.43
QQQALM	6.42
EDRDLE	6.42
SGLSSP	6.4
EGLDLT	6.4
QFLLQQ	6.4
GQPTVL	6.38
QQQQAL	6.38
QQQQAL	6.38
NVKGAV	6.37
RRSSDK	6.36
QVKEEP	6.33
RNTATW	6.32
GLVSLQ	6.31
QCRVQM	6.29
QEQLHL	6.29
QMQQLQ	6.29
RSAPSG	6.24
RPSEPK	6.22
QQALQV	6.19
ECKWPG	6.13
TGSPTL	6.13
QPTVLT	6.09
SLHKCF	6.07
GSPTLV	6.01
PSASGP	6
QVVQQL	5.99
SVKQEG	5.96
GAVWTV	5.96
TPLRPP	5.94
RRPPKM	5.94
AQNHEF	5.93
KPFSQP	5.89
SAADSF	5.89
RPPKMT	5.88
LSHHTL	5.84
FSKVTV	5.81
RRNTAT	5.81
EDLGQF	5.78
QMQQIL	5.72
LGSASL	5.64
PQAAVC	5.6
REVTTG	5.58
QGLVSL	5.57
TWKNAV	5.57
GAPNPS	5.57
QQQALQ	5.56
QQQLLQ	5.56
SFAAPP	5.56
GCETLC	5.54
PGMLNP	5.54
LVKNMI	5.52
QQASGL	5.52
YQKRRP	5.5
GAPVEP	5.5
GLVHPP	5.47
MAHLHM	5.47
NEIYNW	5.44
PVSVAM	5.42
SNGSSS	5.39
LAKESE	5.38
QLLQMQ	5.38
SERLQA	5.36
LPNGQP	5.34
QLLTQQ	5.31
DSFPDG	5.31
ATATSF	5.29
QPLNPV	5.28
RHNLSL	5.26
NPSASG	5.22
QALQVA	5.22
LETPDR	5.21
NDSKQS	5.19
KQSASA	5.19
PLNPVP	5.19
RMFAYF	5.19
ASYQAA	5.18
SPPQYS	5.15
AATATS	5.14
DLTGTA	5.14
SSHEET	5.13
PEDRDL	5.13
PGCETL	5.1
LGNKQL	5.09
CPTDLP	5.09
QEGLDL	5.07
ADSFPD	5.04
SPPRLS	5.02
DVRPPF	5
KQQEQL	4.99
LNSPGM	4.99
QASGLS	4.96
LWKGEG	4.95
GREVTT	4.94
EVTTGA	4.94
SGPPED	4.93
QQLEIQ	4.92
QHLLNL	4.9
QPAEDS	4.9
QMQVVQ	4.9
PISSEL	4.89
HNLSLH	4.88
HLNTEH	4.88
RPPGLG	4.85
QYSHQV	4.85
NWFTRM	4.84
TGREVT	4.83
TSRRDS	4.83
DGLVHP	4.82
KNADVR	4.8
RQFLLQ	4.79
QQALML	4.77
QQAGKP	4.77
APVTPL	4.72
APVEPL	4.72
RSTAQC	4.71
LGAPNP	4.71
VQMQVV	4.66
TGTTAS	4.64
SGPLQT	4.63
EMSPAE	4.62
EAEEDR	4.61
TGTAAT	4.57
PQYSHQ	4.57
ESSFPL	4.56
EELPGE	4.53
ASGLSS	4.52
PFSQPL	4.52
EDSVKQ	4.49
QLQALL	4.49
EQLHLQ	4.48
APGQPA	4.47
ERLQAM	4.46
NKQLAF	4.44
EHALDD	4.44
SPAELL	4.43
QTLPQA	4.42
QASGPL	4.41
SSFSKV	4.4
HPLYGH	4.39
TAATAT	4.38
LPSNGS	4.37
ELPGEE	4.35
KVSPPL	4.28
PARRRS	4.28
NPVPGS	4.27
QMLTPQ	4.26
CEDLGQ	4.24
SKQSAS	4.23
SSLLPL	4.23
EETPGS	4.18
KVTVSA	4.18
CSPISS	4.18
KKQQEQ	4.17
QQQAGK	4.17
QQQHLL	4.17
AEDSVK	4.17
ATSFAA	4.15
IKHLNT	4.15
PDRQLT	4.14
KNMISG	4.14
VEPLPS	4.14
KQLAFQ	4.13
SPTLVK	4.13
LDDRST	4.11
ATGTTA	4.1
HPPTSA	4.1
HDDVGA	4.1
RDLEEE	4.08
HLQLLT	4.06
LQMQQL	4.06
NGQPTV	4.04
EFYKNA	4.04
QKRRPP	4.04
SPPQLQ	4.03
ESERLQ	4.03
PQLQAL	4.02
RLSPPQ	4.02
PNGQPT	3.99
QLEIQL	3.99
AHLHMR	3.97
LQALLQ	3.97
SSSFSK	3.96
NASYQA	3.96
QLAKES	3.95
SPGNND	3.94
SASAVQ	3.94
VAMMSP	3.91
KMTGSP	3.91
FTYASL	3.89
IYNWFT	3.89
AVWTVD	3.88
STAQCR	3.87
PLRPPG	3.86
TPGSHP	3.84
EEELPG	3.81
TTASGT	3.81
SASSLL	3.8
KQEGLD	3.78
PSEPKP	3.78
EEPAEA	3.78
QAGKPQ	3.78
APPKVS	3.77
TVSAAD	3.76
LVHPPT	3.76
SLHGGG	3.75
LEIQLA	3.73
PQMLTP	3.72
NQASGP	3.71
PLSHHT	3.7
SFSKVT	3.7
PVTPLR	3.69
LNASYQ	3.69
PGEELS	3.69
SLLPLS	3.69
TLVKNM	3.68
EDRQPG	3.67
YSHQVQ	3.66
TDLPQL	3.65
LSHDDV	3.64
DDRSTA	3.64
LTSRRD	3.63
RRDSSS	3.62
YFRRNT	3.61
QLQEYY	3.61
VTTGAD	3.6
SAAAPV	3.58
KRRPPK	3.58
FQQQQA	3.57
MQQLQQ	3.57
PKVSPP	3.56
LQQQQA	3.55
TYASLI	3.55
AMMAHL	3.54
LQTLPQ	3.53
KFCSPI	3.52
SHHTLP	3.51
MFAYFR	3.51
LSYGAL	3.51
SNGEMS	3.48
TASGTG	3.46
NLSLHK	3.44
YKNADV	3.42
PLYGHG	3.42
MISGLS	3.4
SRRDSS	3.37
SKVTVS	3.37
PRLSPP	3.35
SSGGAT	3.28
FCSPIS	3.27
LAESSF	3.26
PPRLSP	3.26
LTPQQM	3.25
KCFVRV	3.25
SSFPLL	3.24
TQQQAG	3.24
HQVQVK	3.24
DRSTAQ	3.23
WKNAVR	3.22
FPLLNS	3.22
TPQQMQ	3.21
SASETI	3.21
VPVSVA	3.2
PPTSAA	3.19
AVCPTD	3.19
PFTYAS	3.19
WFTRMF	3.19
AQCRVQ	3.18
QAILET	3.18
AFQQQL	3.17
MQVVQQ	3.17
PPLGAP	3.15
VARQFL	3.14
FAYFRR	3.14
ATWKNA	3.14
TSFAAP	3.13
LGQFIK	3.12
QAAVCP	3.12
HFQQQQ	3.11
ASSLLP	3.11
SAPSGQ	3.08
QRQGLV	3.08
PLQTLP	3.07
PTSAAA	3.06
PKMTGS	3.06
QNGVGS	3.06
NSPGML	3.06
VSPPLS	3.04
HLLNLQ	3.04
ALMLQQ	3.03
VRHNLS	3.02
IRSAPS	3.01
DDVGAP	3.01
LPLSHD	3
PPFTYA	2.99
TATSFA	2.99
DRDLEE	2.98
SSSHEE	2.97
TPDRQL	2.97
PVEPLP	2.97
SSSPPR	2.97
LNTEHA	2.96
MLNPGS	2.96
QFIKHL	2.94
RQGLVS	2.94
NAVRHN	2.92
SHQVQV	2.91
ASLIRQ	2.89
QVPVSV	2.89
PTVLTS	2.88
AAAPVT	2.88
RVENVK	2.88
PNPSAS	2.86
RLQAMM	2.85
EALGNK	2.84
CKWPGC	2.84
SASLHG	2.84
LNEIYN	2.83
HKCFVR	2.82
AVRHNL	2.81
SASGPP	2.81
PKPFSQ	2.8
LQQQHL	2.8
LQRQGL	2.8
SSPPRL	2.8
LSGQAD	2.78
QQILSP	2.78
PTDLPQ	2.76
ENVKGA	2.75
PLLNSP	2.74
PLSHDD	2.74
ELLHFQ	2.74
SYQAAL	2.74
DLEEEL	2.74
EYYKKQ	2.73
HTLPNG	2.73
VLTSRR	2.72
EREYQK	2.72
FQQQLL	2.71
NTEHAL	2.71
AALAES	2.71
LHMRPS	2.7
VQQLEI	2.68
QILSPP	2.67
RQPGPP	2.67
PAEAEE	2.67
VKQEGL	2.64
HALDDR	2.64
LHFQQQ	2.63
ASLHGG	2.62
NPGSAS	2.62
VQVPVS	2.61
DLPQLW	2.6
DLGQFI	2.6
TLCEDL	2.57
DVGAPV	2.56
SLSGQA	2.55
ISSELA	2.55
SFPDGL	2.54
LLNLQR	2.52
EEDRQP	2.52
PQLWKG	2.51
TVLTSR	2.51
ASAVQV	2.5
VSVAMM	2.5
ADGSSG	2.49
NMISGL	2.48
AVQVPV	2.46
PQPKEA	2.46
YNWFTR	2.45
LLNSPG	2.44
PNQASG	2.42
ETPDRQ	2.42
LLHFQQ	2.41
SHPLYG	2.41
YASLIR	2.4
SHEETP	2.39
NHEFYK	2.39
PSGQNG	2.38
ADVRPP	2.38
AMMSPQ	2.36
PPLSHH	2.35
MSPQML	2.32
SSELAQ	2.32
ASGPLQ	2.31
SHDDVG	2.31
MLTPQQ	2.29
VKGAVW	2.29
SAVQVP	2.28
ILSPPQ	2.28
PPQLQA	2.26
MLQQLQ	2.26
VPGSSS	2.25
SLQPNQ	2.22
QADGSS	2.22
ASGTGR	2.21
NNDSKQ	2.2
LAFQQQ	2.2
PLPSNG	2.2
MSPAEL	2.19
NLQRQG	2.19
EYQKRR	2.19
MMAHLH	2.18
ALQVAR	2.16
ETIRSA	2.15
EIQLAK	2.12
SSDKFC	2.12
PVPGSS	2.1
LVSLQP	2.09
MTGSPT	2.08
LQVARQ	2.06
LPQAAV	2.06
LTGTAA	2.06
LQLLTQ	2.05
LIRQAI	2.03
TIRSAP	2.02
VTVSAA	2.01
PPGLGS	2.01
LTQQQA	1.99
SSPGNN	1.98
VQVKEE	1.98
ILETPD	1.97
ASETIR	1.94
MQQILS	1.92
DRQLTL	1.92
DRQPGP	1.92
AILETP	1.91
LPGEEL	1.91
VHPPTS	1.89
VRVENV	1.88
LHGGGP	1.88
LQQASG	1.86
SQPLNP	1.85
PKEALG	1.83
LQPNQA	1.83
ALAESS	1.83
LLTQQQ	1.81
PAEDSV	1.8
FAAPPK	1.79
VRPPFT	1.79
VCPTDL	1.78
ALLQQQ	1.77
MMSPQM	1.76
NADVRP	1.76
FPDGLV	1.75
LDLTGT	1.74
ALGNKQ	1.71
LHLQLL	1.7
AKESER	1.7
PPEDRD	1.67
VKEEPA	1.63
LSLHKC	1.6
SLIRQA	1.56
LLQQQQ	1.54
LTLNEI	1.51
TTGADS	1.5
IRQAIL	1.49
LNLQRQ	1.48
TLPNGQ	1.47
LSPPQL	1.46
VTPLRP	1.45
AAPPKV	1.43
LNPVPG	1.4
LNPGSA	1.37
WKGEGA	1.34
AADSFP	1.33
FLLQQA	1.27
ALDDRS	1.27
AAPVTP	1.26
ARRRSS	1.23
TLPQAA	1.2
WTVDER	1.19
ARQFLL	1.16
TVDERE	1.13
LMLQQL	1.06
LQEYYK	1.04
CRVQMQ	0.96
LLQQAS	0.95
LCEDLG	0.72
MVESAS	0.7
FRRNTA	0.53
MMVESA	0.49
LRPPGL	0.42
MRPSEP	0.33
